# Supplementary material for: Enhanced coking-resistance of Ca- and Mg-incorporated Mo/V montmorillonite-supported catalysts during gas-phase glycerol conversion to allyl alcohol
Source: Royal Society of Chemistry journal article supplement (doi:10.1039/d4cy01300j), 2025-01-01
Supplement: d4cy01300j1.pdf [file d4cy01300j1.pdf]

## Electronic Supporting Information

### **Enhanced coke-resistance of Ca- and Mg-incorporated Mo/V montmorillonite-supported catalysts during gas-phase glycerol conversion to allyl alcohol**

Dajian Li<sup>1,2</sup>, Alfin Kurniawan<sup>1,2,3</sup>, Tania Roy<sup>1,3</sup>, Jin Wang<sup>1,2</sup>, Chenglan Liu<sup>1,2</sup>, Zezhen Wang<sup>1,2</sup>, Rongzhen Mu<sup>1,2</sup>, Chunhui Zhou<sup>1,2,3,\*</sup>

<sup>1</sup> Research Group for Advanced Materials & Sustainable Catalysis (AMSC), State Key Laboratory Breeding Base of Green Chemistry Synthesis Technology, College of Chemical Engineering, Zhejiang University of Technology, Hangzhou 310032, China

<sup>2</sup> Engineering Research Center of Non-metallic Minerals of Zhejiang Province, Zhejiang Institute of Geology and Mineral Resources, Hangzhou 310007, China

<sup>3</sup> Anhui International Exchange and Cooperation Base, Qing Yang Institute for Industrial Minerals (QYIM), Youhua, Qingyang, Chizhou 242804, China

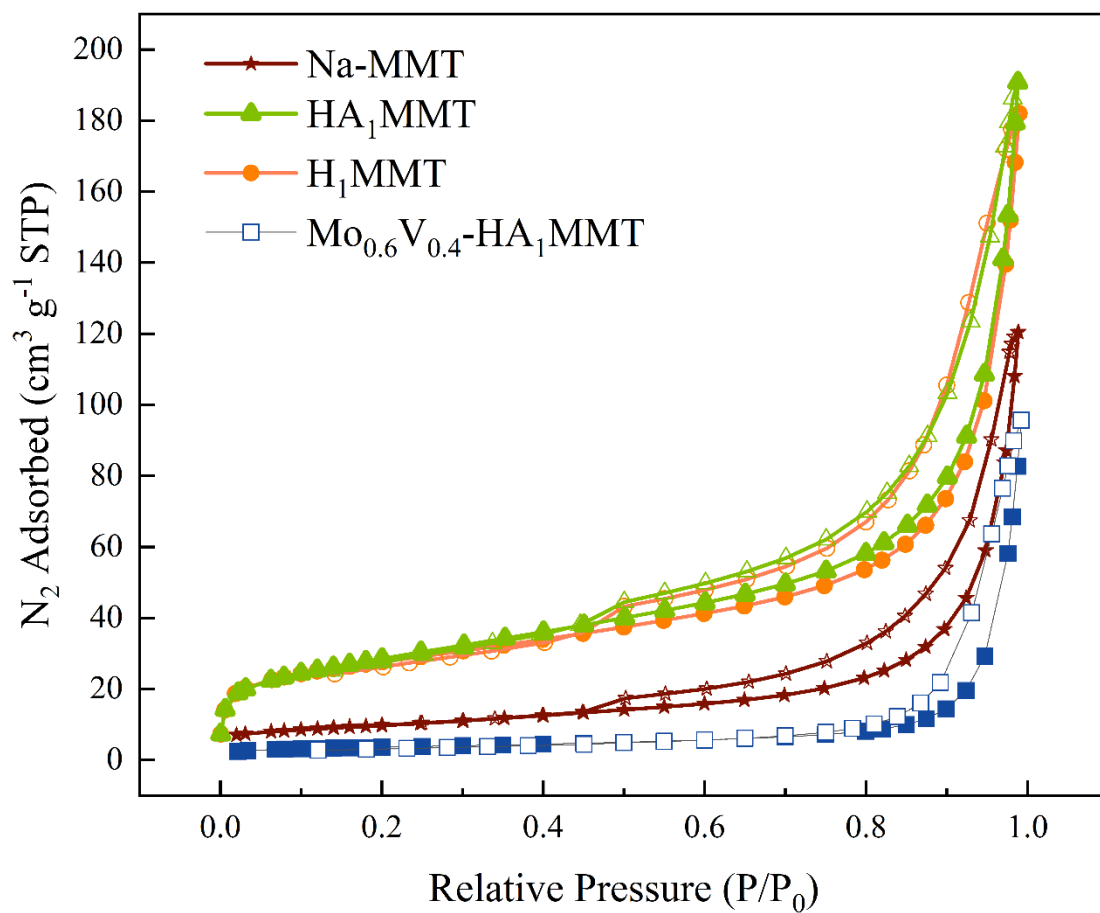

**Figure S1.** The nitrogen isotherms of the prepared catalysts

**Table S1.** Peak retention time of the sample to be tested

| Sample          | Peak retention time (min) |
|-----------------|---------------------------|
| Acetaldehyde    | 2.00~2.10                 |
| Acrolein        | 2.75~2.85                 |
| Methanol        | 3.05~3.15                 |
| Ethanol         | 3.60~3.70                 |
| Allyl alcohol   | 6.70~6.80                 |
| Acetone alcohol | 11.20~11.30               |
| 1,2-propanediol | 17.30~17.40               |
| 1,3-propanediol | 18.10~18.20               |
| Glycerol        | 30.80~31.15               |

Note: Detector: Column model: FFAP (30 m × 0.32 mm × 0.5 μm); Gasification chamber temperature: 300 °C; Injection volume: 1 μL; Column flow rate: 12 mL/min; Split ratio: 40:1 (The peak retention time of the sample was obtained by GC testing using a 1% standard solution)

**Table S2.** Performance comparison of the reported catalysts in the conversion of glycerol to allyl alcohol

| Catalysts                                           | Conv. (%) | Sel. Allyl Alcohol (%) | S <sub>BET</sub> (m <sup>2</sup> g <sup>-1</sup> ) | Acid site concentration (mmol/g) | References |
|-----------------------------------------------------|-----------|------------------------|----------------------------------------------------|----------------------------------|------------|
| Ca <sub>0.5</sub> Mg <sub>0.5</sub> (7)-Cat.        | 81.0      | 46.2                   | /                                                  | 0.214                            | This study |
| Mo/KIT-6 <sup>a</sup>                               | 98.7      | 16.6                   | 433.3                                              | 0.231                            | 1          |
| Fe/KIT-6 <sup>a</sup>                               | 74.7      | 5.6                    | 515.0                                              | 0.135                            |            |
| MoFe0.3/KIT-6                                       | 94.0      | 26.8                   | 457.9                                              | 0.225                            |            |
| ZrO <sub>2</sub> -FeO <sub>x</sub>                  | 100.0     | 13.7                   | /                                                  | /                                | 2          |
| MoFe-N                                              | 71.3      | 14.6                   | 6.27                                               | 0.314                            | 3          |
| MoFe/c-CeO <sub>2</sub>                             | 71.7      | 22.9                   | 23.2                                               | 0.148                            |            |
| MoFe/p <sub>1</sub> -CeO <sub>2</sub>               | 81.0      | 24.5                   | 20.5                                               | 0.234                            |            |
| MoFe/p <sub>2</sub> -CeO <sub>2</sub>               | 97.1      | 23.3                   | 41.8                                               | 0.339                            |            |
| H-ZSM-5/Fe/Rb                                       | 99.9      | 11.9                   | /                                                  | /                                | 4          |
| CoFe11-ZIF-R                                        | 89.7      | 68.7                   | /                                                  | 0.105                            | 5          |
| CuMoAl                                              | ~82       | 15%                    | 159                                                | /                                | 6          |
| Mo <sub>8</sub> V <sub>2</sub> .Ca <sub>2</sub> MMT | 86.5      | 31.6                   | /                                                  | /                                | 7          |
| BEA/Cs/V                                            | 20        | 30                     | 496                                                |                                  | 8          |

## References

1. H. Lan, X. Xiao, S. L. Yuan, B. Zhang, G. L. Zhou and Y. Jiang, *Catal Lett*, 2017, **147**, 2187-2199.
2. E. Arceo, P. Marsden, R. G. Bergman and J. A. Ellman, *Chem. Commun.*, 2009, DOI: 10.1039/B907746D, 3357-3359.
3. H. Lan, J. Zeng, B. Zhang and Y. Jiang, *Res Chem Intermed*, 2019, **45**, 1565-1580.
4. Y. Liu, H. R. Tüysüz, C. J. Jia, M. Schwickardi, R. Rinaldi, A. H. Lu, W. Schmidt and F. Schüth, *Chem. Commun.*, 2010, **46**, 1238-1240.
5. H. Zhao, Y. Jiang, H. Liu, Y. Long, Z. Wang and Z. Hou, *Applied Catalysis B: Environmental*, 2020, **277**, 119187.
6. R. C. R. Santos, D. M. V. Braga, A. N. Pinheiro, E. R. Leite, V. N. Freire, E. Longhinotti and A. Valentini, *Catalysis Science & Technology*, 2016, **6**, 4986-5002.
7. C. C. Li, D. J. Li, S. T. Yin, Z. Z. Wang, C. L. Liu and C. H. Zhou, *Applied Catalysis A: General*, 2023, **665**, 119355.
8. R. Almeida, M. F. Ribeiro, A. Fernandes and J. P. Lourenço, *Catalysis Communications*, 2019, **127**, 20-24.
